# Supplementary material for: Benefit of Catheter Ablation for Atrial Fibrillation in Heart Failure Patients with Different Etiologies
Source: MDPI journal article supplement (doi:10.3390/jcdd10100437), 2023-10-20
Supplement: s1 [file s1]

Table S1. Procedures and complications

| Variable                                         | DCM        | ICM         | TIC        | P     |
|--------------------------------------------------|------------|-------------|------------|-------|
| All pulmonary veins isolated — no. (%)           | 56 (100)   | 68 (100)    | 59 (100)   | 1.00  |
| Additional left atrial linear ablation — no. (%) | 20 (35.7)  | 30 (44.1)   | 20 (34.5)  | 0.45  |
| Total duration of radiofrequency ablation — min  | 86.7±24.4  | 89.1±22.6   | 93.0±33.6  | 0.49  |
| Total duration of fluoroscopy — min              | 6.5±3.2    | 5.2±2.3     | 5.2±2.3    | 0.09  |
| Total duration of procedure — min                | 174.6±51.6 | 173.5±39.70 | 176.9±43.2 | 0.94  |
| Serious complications — no. (%)                  |            |             |            |       |
| Tamponade                                        | 3 (5.4%)   | 4 (5.9%)    | 1 (1.9%)   | 0.47  |
| stroke                                           | 0 (0%)     | 0 (0%)      | 0 (0%)     | 1.00  |
| Repeat operations — no. (%)                      | 14 (25.0)  | 14 (20.1)   | 12 (20.3)  | 0.79  |
| Overall success — no. (%)                        | 25 (52.1)  | 28 (50.0)   | 39 (66.1)  | <0.01 |

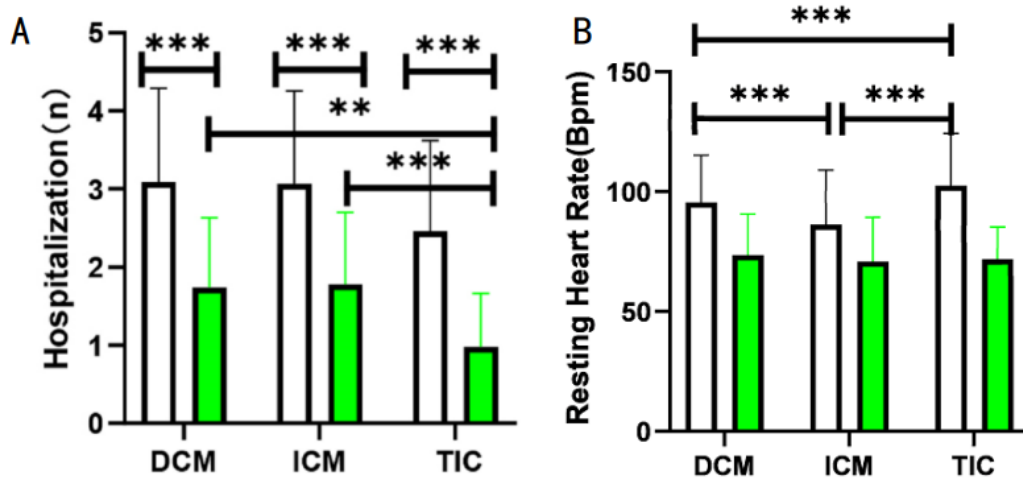

Figure S1. A. HF hospitalization between baseline and after up-to 30-month follow-up; B. Resting heart rate between baseline and after up-to 30-month follow-up. \*  $P < .05$ ; \*\* $P < .01$ ; \*\*\* $P < .001$ ;

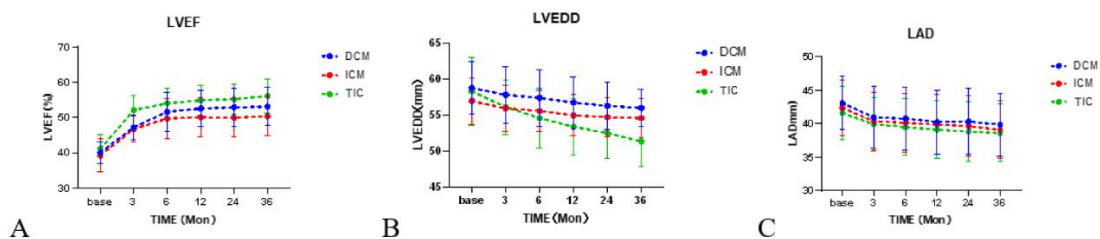

Figure S2. The changes of the three groups at different follow-up times. A. Left ventricular ejection fraction (LVEF); B. Left ventricular end of diastolic dimension (LVEDD); C. Left atrial dimension (LAD);
